# Supplementary material
Source: Springer Nature journal article supplement (https://www.springermedizin.de/resource/supplementary/12876_2010_538_MOESM2_ESM.pdf/9437266)

**A****Western Blot**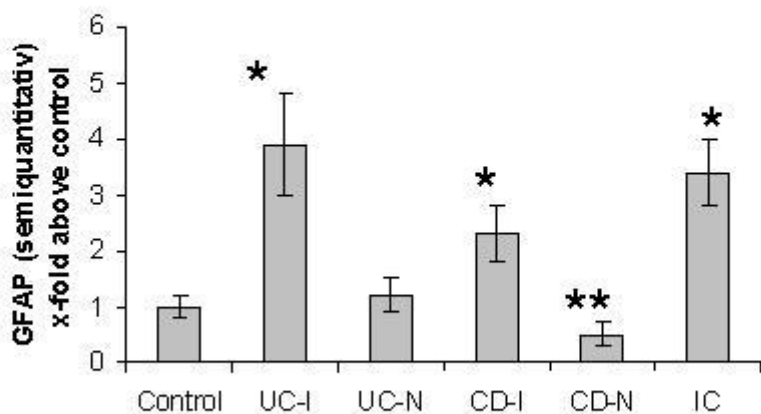**B****ELISA**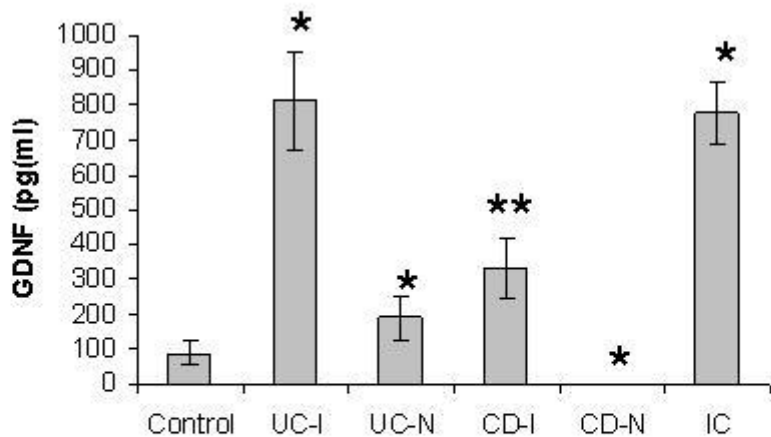

Supplement: MOESM2 [file 9437266]
